# Supplementary material for: Thiophene anchored naphthalene derivative: Cr3+ selective turn-on fluorescent probe for living cell imaging
Source: Royal Society of Chemistry journal article supplement (doi:10.1039/c2ay25384d), 2012-01-01
Supplement: c2ay25384d.pdf [file c2ay25384d.pdf]

## Supporting Information (ESI)

### Thiophene anchored naphthalene derivative: Cr<sup>3+</sup> selective turn-on fluorescent probe for living cell imaging

Sudipta Das<sup>a</sup>, Animesh Sahana<sup>a</sup>, Arnab Banerjee<sup>a</sup>, Sisir Lohar<sup>a</sup>, Subarna Guha<sup>a</sup>, Jesús Sanmartín Matalobos<sup>b\*</sup> and Debasis Das<sup>a\*</sup> from

<sup>a</sup>Department of Chemistry, The University of Burdwan, Burdwan, West Bengal, India

<sup>b</sup> Departamento de Química Inorgánica, Facultad de Química, Avda. Das Ciencias s/n, 15782, Santiago de Compostela, Spain.

Debasis Das < e-mail: ddas100in@yahoo.com >; Tel: +91-342-2533913; Fax: +91-342-2530452

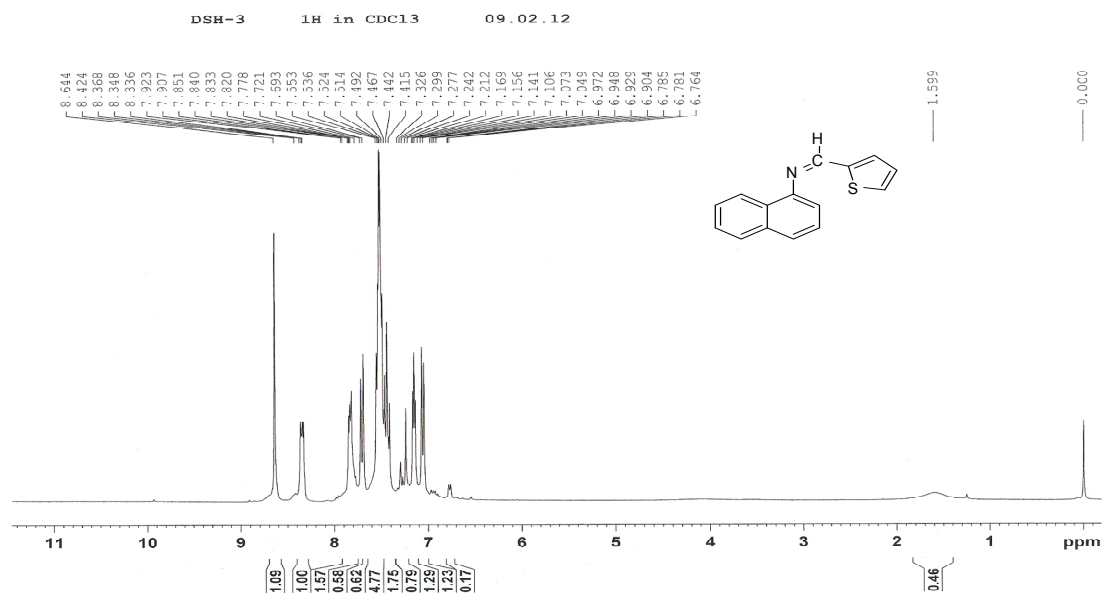

Fig. S1a. <sup>1</sup>H NMR spectrum of L in CDCl<sub>3</sub>.

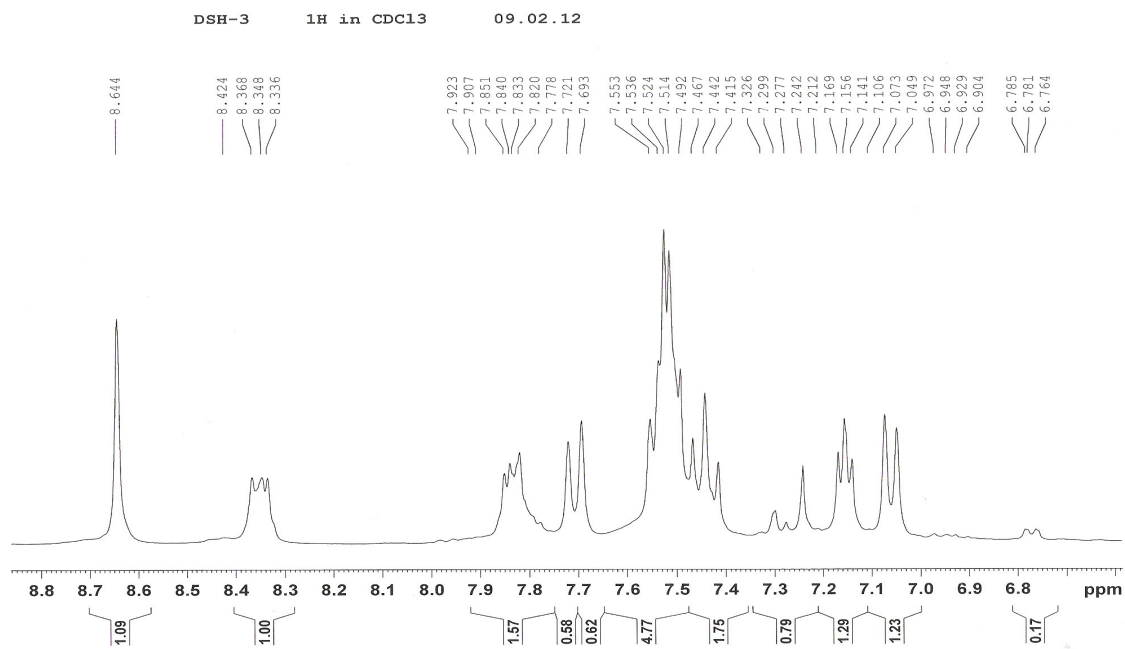

Fig. S1b.  $^1\text{H}$  NMR spectrum (expanded to aromatic region) of **L** in  $\text{CDCl}_3$ .

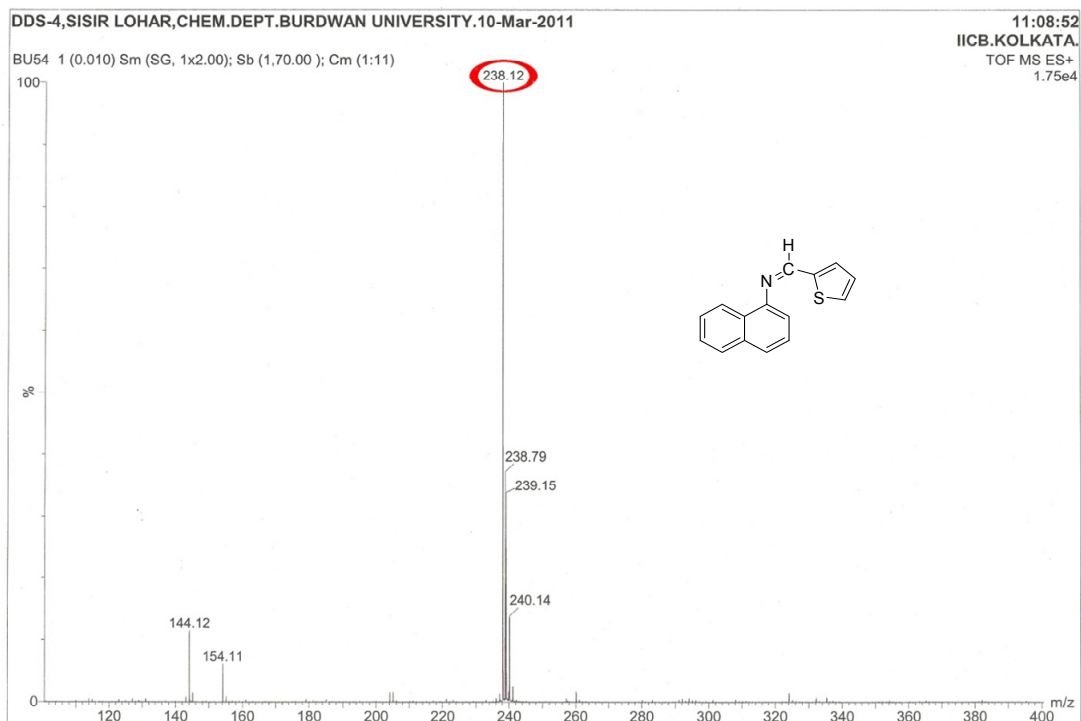

Fig. S2. Mass spectrum of **L**.

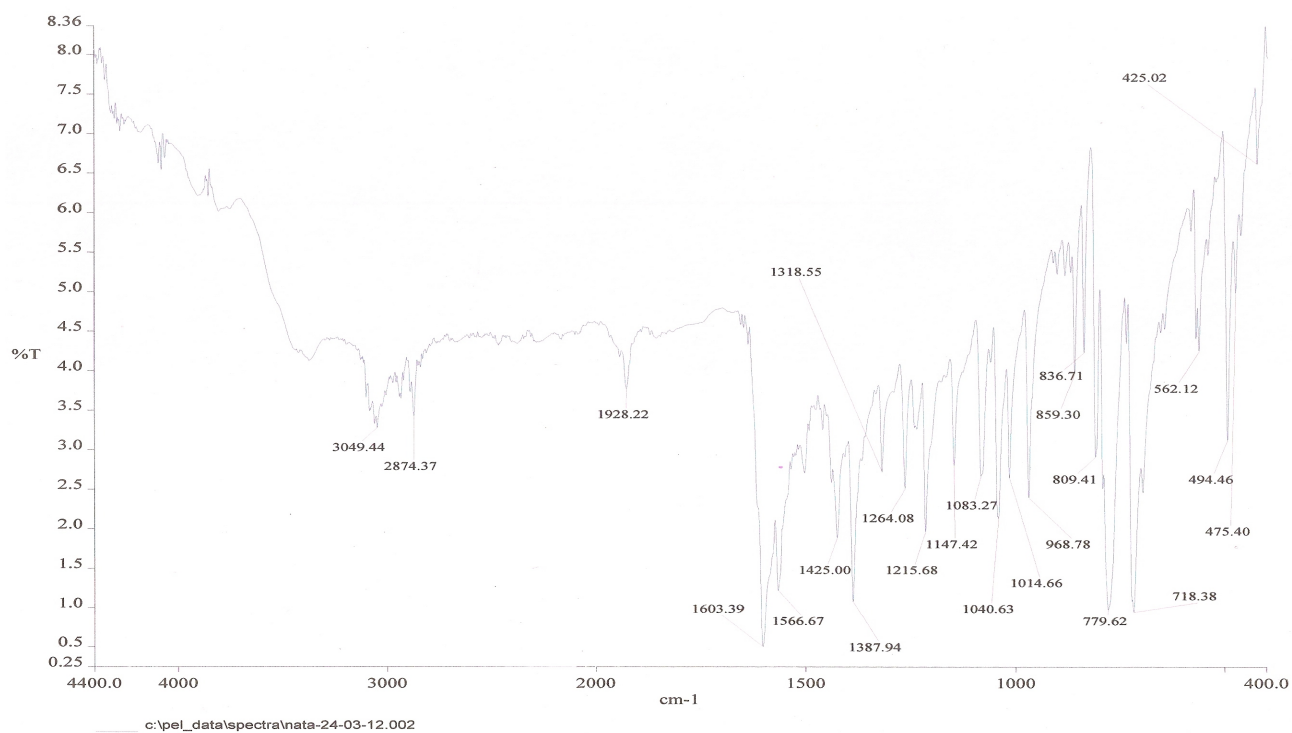

**Fig. S3.** FTIR spectrum of L.

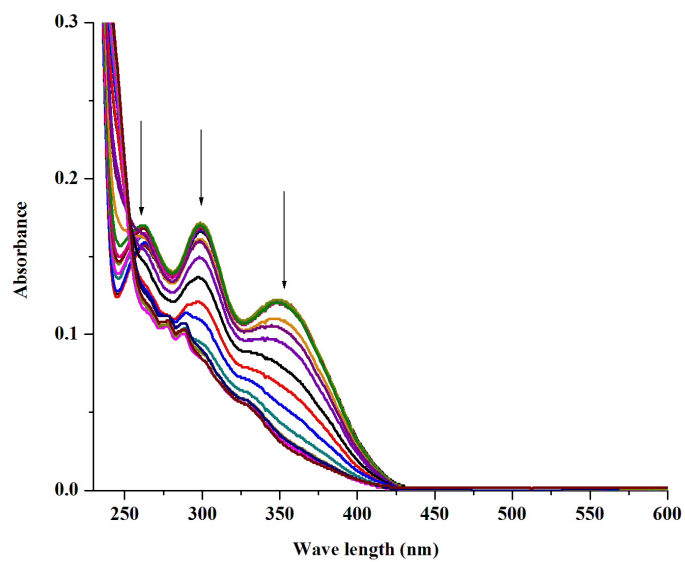

**Fig. S4.** UV-Vis spectral changes of L (10 μ M) with gradual addition of 0.1 to 5.5 times [Cr<sup>3+</sup>] from top to bottom.

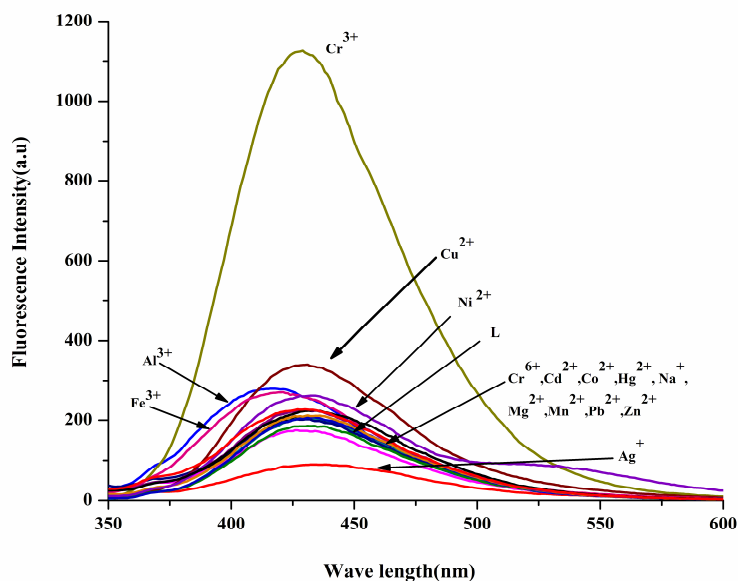

Fig. S5. Fluorescence spectra of **L** (10  $\mu$ M), **L** + Cr<sup>3+</sup> (45  $\mu$ M) and **L** (10  $\mu$ M) + M<sup>n+</sup> (300  $\mu$ M), where M<sup>n+</sup> = Na<sup>+</sup>, Mg<sup>2+</sup>, Cr<sup>6+</sup> (Cr<sub>2</sub>O<sub>7</sub><sup>2-</sup>), Mn<sup>2+</sup>, Fe<sup>3+</sup>, Co<sup>2+</sup>, Ni<sup>2+</sup>, Cu<sup>2+</sup>, Zn<sup>2+</sup>, Hg<sup>2+</sup>, Pb<sup>2+</sup>, Cd<sup>2+</sup>, Ag<sup>+</sup>, Al<sup>3+</sup> ( $\lambda_{em}$ : 435 nm,  $\lambda_{ex}$ : 330 nm).

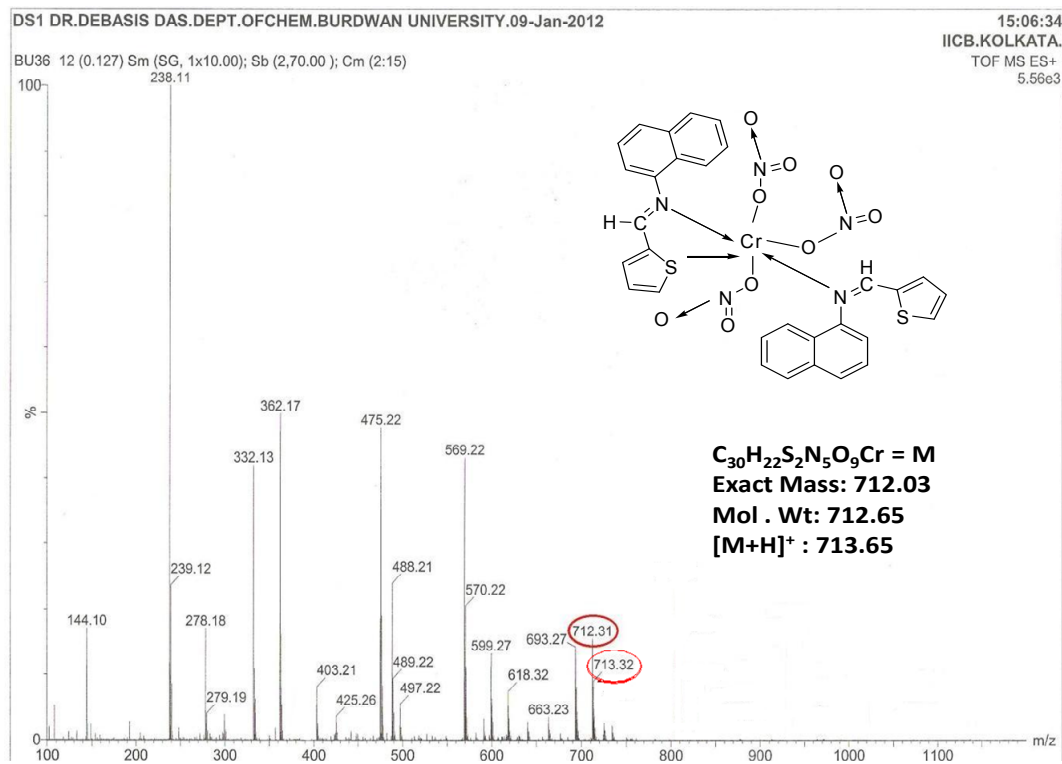

Fig. S6 Mass spectrum of L-Cr<sup>3+</sup> complex.

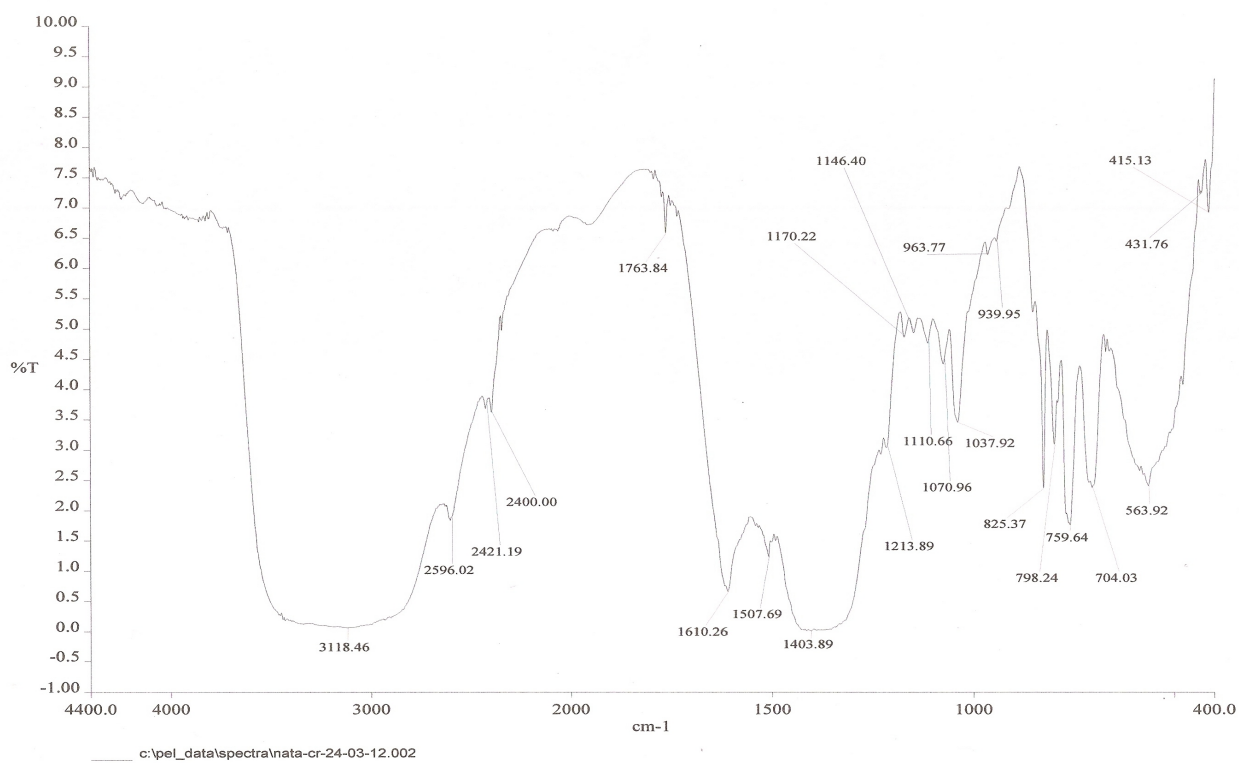

**Fig. S7** FTIR spectrum of L-Cr<sup>3+</sup> complex.

| <b>Table S1. Bond lengths of L</b> |                   |                                 |                   |
|------------------------------------|-------------------|---------------------------------|-------------------|
| <b>Bond</b>                        | <b>Length (Å)</b> | <b>Bond</b>                     | <b>Length (Å)</b> |
| C <sub>1</sub> C <sub>2</sub>      | 1.377(3)          | C <sub>8</sub> C <sub>9</sub>   | 1.371(3)          |
| C <sub>1</sub> N <sub>1</sub>      | 1.415(2)          | C <sub>8</sub> H <sub>8</sub>   | 0.9500            |
| C <sub>1</sub> C <sub>10</sub>     | 1.429(2)          | C <sub>9</sub> C <sub>10</sub>  | 1.421(3)          |
| C <sub>2</sub> C <sub>3</sub>      | 1.403(3)          | C <sub>9</sub> H <sub>9</sub>   | 0.9500            |
| C <sub>2</sub> H <sub>2</sub>      | 0.9500            | C <sub>11</sub> N <sub>1</sub>  | 1.281(2)          |
| C <sub>3</sub> C <sub>4</sub>      | 1.367(3)          | C <sub>11</sub> C <sub>12</sub> | 1.445(3)          |
| C <sub>3</sub> H <sub>3</sub>      | 0.9500            | C <sub>11</sub> H <sub>11</sub> | 0.9500            |
| C <sub>4</sub> C <sub>5</sub>      | 1.417(3)          | C <sub>12</sub> C <sub>13</sub> | 1.374(3)          |
| C <sub>4</sub> H <sub>4</sub>      | 0.9500            | C <sub>12</sub> S <sub>1</sub>  | 1.7268(19)        |
| C <sub>5</sub> C <sub>6</sub>      | 1.413(3)          | C <sub>13</sub> C <sub>14</sub> | 1.408(3)          |
| C <sub>5</sub> C <sub>10</sub>     | 1.428(3)          | C <sub>13</sub> H <sub>13</sub> | 0.9500            |
| C <sub>6</sub> C <sub>7</sub>      | 1.361(3)          | C <sub>14</sub> C <sub>15</sub> | 1.356(3)          |
| C <sub>6</sub> H <sub>6</sub>      | 0.9500            | C <sub>14</sub> H <sub>14</sub> | 0.9500            |
| C <sub>7</sub> C <sub>8</sub>      | 1.413(3)          | C <sub>15</sub> S <sub>1</sub>  | 1.7194(19)        |
| C <sub>7</sub> H <sub>7</sub>      | 0.9500            | C <sub>15</sub> H <sub>15</sub> | 0.9500            |

| <b>Table S2: Bond angles of L</b>               |                       |                                                 |                       |
|-------------------------------------------------|-----------------------|-------------------------------------------------|-----------------------|
| <b>Bond Angle</b>                               | <b>(<sup>o</sup>)</b> | <b>Bond Angle</b>                               | <b>(<sup>o</sup>)</b> |
| C <sub>2</sub> C <sub>1</sub> N <sub>1</sub>    | 123.11(16)            | C <sub>7</sub> C <sub>8</sub> H <sub>8</sub>    | 119.8                 |
| C <sub>2</sub> C <sub>1</sub> C <sub>10</sub>   | 119.91(16)            | C <sub>8</sub> C <sub>9</sub> C <sub>10</sub>   | 120.47(19)            |
| N <sub>1</sub> C <sub>1</sub> C <sub>10</sub>   | 116.98(15)            | C <sub>8</sub> C <sub>9</sub> H <sub>9</sub>    | 119.8                 |
| C <sub>1</sub> C <sub>2</sub> C <sub>3</sub>    | 120.67(17)            | C <sub>10</sub> C <sub>9</sub> H <sub>9</sub>   | 119.8                 |
| C <sub>1</sub> C <sub>2</sub> H <sub>2</sub>    | 119.7                 | C <sub>9</sub> C <sub>10</sub> C <sub>5</sub>   | 118.70(16)            |
| C <sub>3</sub> C <sub>2</sub> H <sub>2</sub>    | 119.7                 | C <sub>9</sub> C <sub>10</sub> C <sub>1</sub>   | 122.50(17)            |
| C <sub>4</sub> C <sub>3</sub> C <sub>2</sub>    | 120.81(17)            | C <sub>5</sub> C <sub>10</sub> C <sub>1</sub>   | 118.80(16)            |
| C <sub>4</sub> C <sub>3</sub> H <sub>3</sub>    | 119.6                 | N <sub>1</sub> C <sub>11</sub> C <sub>12</sub>  | 122.30(17)            |
| C <sub>2</sub> C <sub>3</sub> H <sub>3</sub>    | 119.6                 | N <sub>1</sub> C <sub>11</sub> H <sub>11</sub>  | 118.8                 |
| C <sub>3</sub> C <sub>4</sub> C <sub>5</sub>    | 120.54(18)            | C <sub>12</sub> C <sub>11</sub> H <sub>11</sub> | 118.8                 |
| C <sub>3</sub> C <sub>4</sub> H <sub>4</sub>    | 119.7                 | C <sub>13</sub> C <sub>12</sub> C <sub>11</sub> | 127.31(17)            |
| C <sub>5</sub> C <sub>4</sub> H <sub>4</sub>    | 119.7                 | C <sub>13</sub> C <sub>12</sub> S <sub>1</sub>  | 111.43(14)            |
| C <sub>6</sub> C <sub>5</sub> C <sub>4</sub>    | 121.86(17)            | C <sub>11</sub> C <sub>12</sub> S <sub>1</sub>  | 121.16(14)            |
| C <sub>6</sub> C <sub>5</sub> C <sub>10</sub>   | 119.02(16)            | C <sub>12</sub> C <sub>13</sub> H <sub>13</sub> | 123.7                 |
| C <sub>4</sub> C <sub>5</sub> C <sub>10</sub>   | 119.11(17)            | C <sub>14</sub> C <sub>13</sub> H <sub>13</sub> | 123.7                 |
| C <sub>7</sub> C <sub>6</sub> C <sub>5</sub>    | 120.94(18)            | C <sub>15</sub> C <sub>14</sub> C <sub>13</sub> | 112.69(17)            |
| C <sub>7</sub> C <sub>6</sub> H <sub>6</sub>    | 119.5                 | C <sub>15</sub> C <sub>14</sub> H <sub>14</sub> | 123.7                 |
| C <sub>5</sub> C <sub>6</sub> H <sub>6</sub>    | 119.5                 | C <sub>13</sub> C <sub>14</sub> H <sub>14</sub> | 123.7                 |
| C <sub>6</sub> C <sub>7</sub> C <sub>8</sub>    | 120.43(18)            | C <sub>14</sub> C <sub>15</sub> S <sub>1</sub>  | 112.38(15)            |
| C <sub>6</sub> C <sub>7</sub> H <sub>7</sub>    | 119.8                 | C <sub>14</sub> C <sub>15</sub> H <sub>15</sub> | 123.8                 |
| C <sub>8</sub> C <sub>7</sub> H <sub>7</sub>    | 119.8                 | S <sub>1</sub> C <sub>15</sub> H <sub>15</sub>  | 123.8                 |
| C <sub>9</sub> C <sub>8</sub> C <sub>7</sub>    | 120.41(18)            | C <sub>11</sub> N <sub>1</sub> C <sub>1</sub>   | 118.28(15)            |
| C <sub>9</sub> C <sub>8</sub> H <sub>8</sub>    | 119.8                 | C <sub>15</sub> S <sub>1</sub> C <sub>12</sub>  | 90.98(10)             |
| C <sub>12</sub> C <sub>13</sub> C <sub>14</sub> | 112.53(18).           |                                                 |                       |

### General method of UV-Vis and fluorescence titration

Path length of the cells used for absorption and emission studies was 1 cm. For UV-vis and fluorescence titrations, stock solution of **L** (10  $\mu\text{M}$ ) was prepared in methanol water. Working solutions were prepared from their respective stock solutions. Fluorescence measurements were performed using 5 nm  $\times$  5 nm slit width.

### Calculation of Quantum Yield

Fluorescence quantum yields ( $\Phi$ ) were estimated by integrating the area under the fluorescence curves using the equation<sup>1</sup>,

$$\phi_{\text{sample}} = \phi_{\text{ref}} \times \frac{\text{OD}_{\text{ref}} \times A_{\text{sample}} \times \eta_{\text{sample}}^2}{\text{OD}_{\text{sample}} \times A_{\text{ref}} \times \eta_{\text{ref}}^2}$$

where, **A** was the area under the fluorescence spectral curve, **OD** was optical density of the compound at the excitation wavelength and  $\eta$  was the refractive indices<sup>2</sup> of the solvent. Anthracene was used as quantum yield standard (quantum yield is 0.27 in ethanol)<sup>3</sup> for measuring the quantum yields at 330 nm.

### References

1. E. Austin and M. Gouterman, *Bioinorg. Chem.*, 1978, **9**, 281.
2. F. I. El - Dossoki, *J Chin. Chem. Soc.*, 2007, **54**, 1129.
3. W. H. Melhuish, *J. Phys. Chem.*, 1961, **65**, 229.



### **Job's plot using fluorescence data**

A series of solutions containing **L** and  $\text{Cr}^{3+}$  were prepared such that the total concentration of  $\text{Cr}^{3+}$  and **L** remain constant ( $10\ \mu\text{M}$ ) in all the sets. The mole fraction ( $X$ ) of **L** was varied from 0.1 to 0.9. The fluorescence intensity at 435 nm was plotted against the mole fraction of **L**.
